# Supplementary material for: Genomic analysis reveals independent evolution of Plasmodium falciparum populations in Ethiopia
Source: Malar J. 2021 Mar 4;20:129. doi: 10.1186/s12936-021-03660-y (PMC7934276; doi:10.1186/s12936-021-03660-y)
Supplement: Supplementary file 3 — Additional file 3. FWS values of samples in P. falciparum populations analyzed in this study. [file 12936_2021_3660_MOESM3_ESM.xls]

## Sheet: Sheet1
Sample_id	FWS	Country
PH0877-C	0.998691	Cambodia
PH0878-C	0.998508	Cambodia
PH0871-C	0.998437	Cambodia
PH0874-Cx	0.998413	Cambodia
PH0899-C	0.997998	Cambodia
PH0912-C	0.997857	Cambodia
PH0933-C	0.997679	Cambodia
PH0987-C	0.997518	Cambodia
PH0676-C	0.997493	Cambodia
PH0984-C	0.997478	Cambodia
PH0904-C	0.997467	Cambodia
PH0915-C	0.997424	Cambodia
PH0866-C	0.997396	Cambodia
PH0991-C	0.997378	Cambodia
PH0928-C	0.997339	Cambodia
PH0979-C	0.997334	Cambodia
PH0880-C	0.997253	Cambodia
PH0994-C	0.997094	Cambodia
PH0921-C	0.996979	Cambodia
PH0925-C	0.996699	Cambodia
PH0990-C	0.996591	Cambodia
PH0983-C	0.996146	Cambodia
PH0999-C	0.995344	Cambodia
PH0982-C	0.995252	Cambodia
PH0924-C	0.994971	Cambodia
PH0902-C	0.994845	Cambodia
PH0911-Cx	0.993188	Cambodia
PH0939-C	0.992481	Cambodia
PH1003-C	0.992417	Cambodia
PH0910-C	0.992192	Cambodia
PH0937-C	0.989049	Cambodia
PH0920-Cx	0.988538	Cambodia
PH0931-C	0.981846	Cambodia
PH0932-C	0.974488	Cambodia
PH0901-C	0.972807	Cambodia
PH0976-C	0.966202	Cambodia
PH0905-C	0.932159	Cambodia
PH0935-C	0.919433	Cambodia
PH0903-C	0.917528	Cambodia
PH0876-C	0.902756	Cambodia
PH1007-C	0.890177	Cambodia
PH0918-Cx	0.865946	Cambodia
PH0917-Cx	0.825959	Cambodia
PH0940-Cx	0.792392	Cambodia
PH0941-C	0.747816	Cambodia
PH0938-C	0.702386	Cambodia
QG0249-C	0.997693	DRCongo
QG0216-C	0.997578	DRCongo
QG0205-C	0.997416	DRCongo
QG0210-C	0.997328	DRCongo
QG0257-C	0.996601	DRCongo
QG0256-C	0.996551	DRCongo
QG0258-C	0.99635	DRCongo
QG0269-C	0.996287	DRCongo
QG0223-C	0.996283	DRCongo
QG0232-C	0.996153	DRCongo
QG0225-C	0.995753	DRCongo
QG0201-C	0.995727	DRCongo
QG0291-C	0.994738	DRCongo
QG0247-C	0.994711	DRCongo
QG0202-C	0.992266	DRCongo
QG0252-C	0.991139	DRCongo
QG0286-C	0.989867	DRCongo
QG0245-C	0.989167	DRCongo
QG0239-C	0.988489	DRCongo
QG0281-C	0.986934	DRCongo
QG0255-C	0.986225	DRCongo
QG0219-C	0.978084	DRCongo
QG0211-C	0.973025	DRCongo
QG0236-C	0.972046	DRCongo
QG0204-C	0.960144	DRCongo
QG0270-C	0.935857	DRCongo
QG0263-C	0.909576	DRCongo
QG0188-C	0.891102	DRCongo
QG0215-C	0.881828	DRCongo
QG0194-C	0.796905	DRCongo
QG0207-C	0.784071	DRCongo
QG0260-C	0.767547	DRCongo
QG0280-C	0.740994	DRCongo
QG0240-C	0.719601	DRCongo
QG0253-C	0.708655	DRCongo
QG0203-C	0.705543	DRCongo
QG0294-C	0.683045	DRCongo
QG0244-C	0.680622	DRCongo
QG0231-C	0.67588	DRCongo
QG0279-C	0.659683	DRCongo
QG0213-C	0.633873	DRCongo
QG0230-C	0.618988	DRCongo
QG0235-C	0.584642	DRCongo
QG0183-C	0.561061	DRCongo
QG0189-C	0.553215	DRCongo
QG0197-C	0.543403	DRCongo
QG0191-C	0.540406	DRCongo
QG0217-C	0.51762	DRCongo
QG0193-C	0.512434	DRCongo
QG0284-C	0.321382	DRCongo
QS0159-C	0.997137	Ethiopia
QS0144-C	0.996894	Ethiopia
QS0104-C	0.996588	Ethiopia
QS0132-C	0.99644	Ethiopia
QS0056-C	0.996261	Ethiopia
QS0133-C	0.996109	Ethiopia
QS0110-C	0.996067	Ethiopia
QS0109-C	0.99481	Ethiopia
QS0168-C	0.994701	Ethiopia
QS0169-C	0.994348	Ethiopia
QS0087-C	0.994031	Ethiopia
QS0170-C	0.992928	Ethiopia
QS0166-C	0.989183	Ethiopia
QS0162-C	0.988266	Ethiopia
QS0157-C	0.98696	Ethiopia
QS0155-C	0.986862	Ethiopia
QS0163-C	0.984241	Ethiopia
QS0154-C	0.983354	Ethiopia
QS0135-C	0.981552	Ethiopia
QS0129-C	0.9758	Ethiopia
QS0116-C	0.953469	Ethiopia
QS0127-C	0.926686	Ethiopia
QS0126-C	0.896055	Ethiopia
QS0156-C	0.892935	Ethiopia
QS0128-C	0.836655	Ethiopia
PT0215-C	0.997242	Malawi
PT0270-C	0.996124	Malawi
PT0146-C	0.996026	Malawi
PT0234-Cx	0.995687	Malawi
PT0080-C	0.99519	Malawi
PT0034-C	0.995084	Malawi
PT0129-C	0.994551	Malawi
PT0086-C	0.994403	Malawi
PT0197-C	0.992789	Malawi
PT0009-CW	0.992516	Malawi
PT0218-C	0.992231	Malawi
PT0133-C	0.992121	Malawi
PT0018-CW	0.991634	Malawi
PT0145-C	0.990703	Malawi
PT0137-C	0.987987	Malawi
PT0109-C	0.979194	Malawi
PT0173-C	0.977232	Malawi
PT0195-C	0.965851	Malawi
PT0073-C	0.928994	Malawi
PT0239-Cx	0.908744	Malawi
PT0090-C	0.895619	Malawi
PT0091-C	0.895347	Malawi
PT0196-C	0.889123	Malawi
PT0237-C	0.806107	Malawi
PT0271-C	0.776008	Malawi
PT0117-C	0.748263	Malawi
PT0124-C	0.738546	Malawi
PT0078-Cx	0.696855	Malawi
PT0043-C	0.664293	Malawi
PT0260-C	0.659908	Malawi
PT0055-C	0.65613	Malawi
PT0085-C	0.649961	Malawi
PT0228-C	0.639394	Malawi
PT0209-C	0.638884	Malawi
PT0136-C	0.628147	Malawi
PT0103-C	0.586214	Malawi
PT0266-C	0.56953	Malawi
PT0001-CW	0.563728	Malawi
PT0139-C	0.556604	Malawi
PT0252-C	0.538319	Malawi
PT0125-C	0.531098	Malawi
PT0212-C	0.526039	Malawi
PT0089-C	0.523655	Malawi
PT0150-C	0.436317	Malawi
PT0250-C	0.431552	Malawi
PT0140-C	0.333279	Malawi
PT0112-C	0.323974	Malawi
PT0113-C	0.321525	Malawi
PT0051-C	0.246234	Malawi
PT0231-C	0.193641	Malawi
PD0561-C	0.997941	Thailand
PD0528-C	0.997579	Thailand
PD0516-C	0.997454	Thailand
PD0532-C	0.997121	Thailand
PD0563-C	0.99682	Thailand
PD0632-C	0.996756	Thailand
PD0529-C	0.996615	Thailand
PD0571-C	0.996517	Thailand
PD0564-C	0.996506	Thailand
PD0481-C	0.996242	Thailand
PD0637-C	0.995867	Thailand
PD0520-C	0.995782	Thailand
PD0553-C	0.995776	Thailand
PD0521-C	0.99573	Thailand
PD0497-C	0.995599	Thailand
PD0570-C	0.995454	Thailand
PD0496-C	0.995292	Thailand
PD0573-C	0.995283	Thailand
PD0525-C	0.995178	Thailand
PD0549-C	0.995088	Thailand
PD0527-C	0.995047	Thailand
PD0556-C	0.994847	Thailand
PD0494-C	0.994842	Thailand
PD0565-C	0.994703	Thailand
PD0539-C	0.994416	Thailand
PD0547-C	0.994309	Thailand
PD0546-C	0.994309	Thailand
PD0487-C	0.99383	Thailand
PD0530-C	0.993579	Thailand
PD0535-C	0.993174	Thailand
PD0523-C	0.992455	Thailand
PD0636-C	0.985588	Thailand
PD0574-C	0.982754	Thailand
PD0543-C	0.982582	Thailand
PD0495-C	0.981885	Thailand
PD0559-C	0.975711	Thailand
PD0541-C	0.974144	Thailand
PD0569-C	0.970297	Thailand
PD0545-C	0.955092	Thailand
PD0538-C	0.907324	Thailand
PD0531-C	0.885504	Thailand
PD0482-C	0.846605	Thailand
PD0534-C	0.814862	Thailand
PD0536-C	0.781611	Thailand
PD0537-C	0.776152	Thailand
PD0485-C	0.637167	Thailand
PD0484-C	0.63013	Thailand
PD0566-C	0.614597	Thailand
PD0517-C	0.483456	Thailand
